# Supplementary material
Source: bioRxiv or medRxiv preprint supplement (https://www.biorxiv.org/highwire/filestream/46898/field_highwire_adjunct_files/2/157578-3.pdf)
Supplement: Supplementary file [file 157578-3.pdf]

**Supplementary Table 3: Multiple stepwise linear regression analysis**

| Model |                  | Model strength            |             | $\beta$ | T      | Significance |
|-------|------------------|---------------------------|-------------|---------|--------|--------------|
|       |                  | <i>Adj. R<sup>2</sup></i> | <i>Sig.</i> |         |        |              |
| 1     | Age (years)      | 0.000                     | 0.962       | 0.012   | 0.234  | 0.815        |
|       | Sex              |                           |             | 0.007   | 0.139  | 0.890        |
| 2     | Age              | 0.025                     | 0.024       | -0.058  | -1.029 | 0.304        |
|       | Sex              |                           |             | 0.002   | 0.034  | 0.973        |
|       | BMI              |                           |             | 0.174   | 3.083  | 0.002        |
| 3     | Age              | 0.092                     | 0.000       | -0.063  | -1.158 | 0.247        |
|       | Sex              |                           |             | -0.078  | -1.494 | 0.136        |
|       | BMI              |                           |             | 0.106   | 1.889  | 0.060        |
|       | Triglycerides    |                           |             | 0.281   | 5.209  | 0.000        |
| 4     | Age              | 0.122                     | 0.000       | -0.106  | -1.929 | 0.054        |
|       | Sex              |                           |             | -0.09   | -1.751 | 0.081        |
|       | BMI              |                           |             | 0.061   | 1.08   | 0.281        |
|       | Triglycerides    |                           |             | 0.238   | 4.368  | 0.000        |
|       | Fasting glucose  |                           |             | 0.196   | 3.493  | 0.001        |
| 5     | Age              | 0.134                     | 0.000       | -0.139  | -2.46  | 0.014        |
|       | Sex              |                           |             | -0.09   | -1.768 | 0.078        |
|       | BMI              |                           |             | 0.053   | 0.944  | 0.346        |
|       | Triglycerides    |                           |             | 0.193   | 3.333  | 0.001        |
|       | Fasting glucose  |                           |             | 0.196   | 3.5    | 0.001        |
|       | Apolipoprotein B |                           |             | 0.128   | 2.279  | 0.023        |

Adj. R<sup>2</sup>- Adjusted coefficient of determination; Sig.- Significance (p-value) of the model;  $\beta$ - standardized coefficient  $\beta$ ; T- t-value; Significance- P-value of each individual fact
